# Supplementary material
Source: publisher figshare collection journal article supplement (https://gsajournals.figshare.com/ndownloader/files/18315251)
Supplement: Supplementary file 1 [file 18315251]

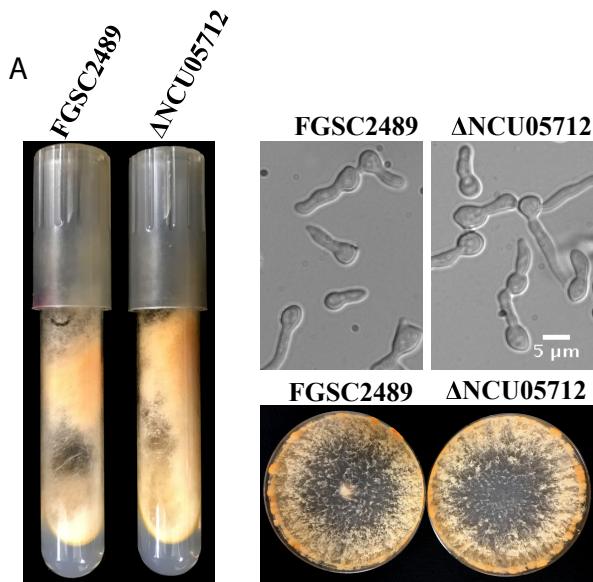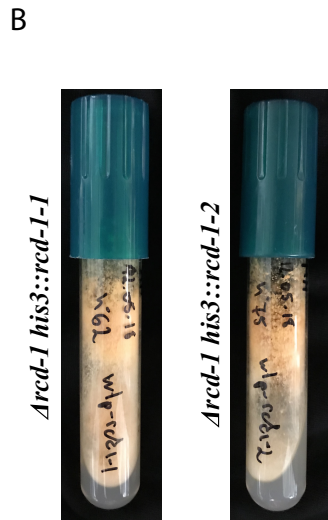

Figure S1. Morphological characterization of *rcd-1* engineered strains in this study. A. Deletion of NCU05712 does not lead to growth, conidiation (left panels, bottom right panels) or germination defects (top right panels). B. Introduction of an *rcd-1-2* allele targeted to the *his-3* locus in an *rcd-1* deletion strain in the otherwise FGSC2489 genetic background does not produce any visible phenotype.
